# Supplementary material
Source: PubMed Central journal article supplement (PMC2134910)
Supplement: neo0912_1138SD1.pdf [file neo0912_1138SD1.pdf]

**Table W1.** Changes in Endogenous Enzyme Activities for PC-3 Cells and HUVECs under Different Conditions in Relation to the Invasion Index Measurements.

| Experimental Condition                  | Invasion Index $I(t)$ (MR Experiments) | Endogenous Enzyme Activity per Cell of |                                        |                                        |
|-----------------------------------------|----------------------------------------|----------------------------------------|----------------------------------------|----------------------------------------|
|                                         |                                        | MMP-2                                  | MMP-9                                  | uPA                                    |
| PC-3 <sub>Bb</sub> on ECM               | 20% O <sub>2</sub> > 1% O <sub>2</sub> | 20% O <sub>2</sub> < 1% O <sub>2</sub> | 20% O <sub>2</sub> < 1% O <sub>2</sub> | 20% O <sub>2</sub> < 1% O <sub>2</sub> |
| PC-3 <sub>T</sub>                       | N/A                                    | 20% O <sub>2</sub> < 1% O <sub>2</sub> | 20% O <sub>2</sub> < 1% O <sub>2</sub> | 20% O <sub>2</sub> < 1% O <sub>2</sub> |
| PC-3 <sub>Bb</sub> on HuvECM            | 20% O <sub>2</sub> > 1% O <sub>2</sub> |
| PC-3, 20% O <sub>2</sub>                | N/A                                    | Plastic > ECM                          | Plastic > ECM                          | Plastic > ECM                          |
| PC-3, 1% O <sub>2</sub>                 | N/A                                    | Inconclusive                           | Plastic ≤ ECM                          | Plastic < ECM                          |
| PC-3 <sub>Bb</sub> , 20% O <sub>2</sub> | ECM = HuvECM                           | Inconclusive                           | ECM < HuvECM                           | ECM ≤ HuvECM                           |
| PC-3 <sub>Bb</sub> , 1% O <sub>2</sub>  | ECM < HuvECM                           | ECM ≥ HuvECM                           | ECM > HuvECM                           | ECM > HuvECM                           |
| HuvECM                                  | N/A                                    | 20% O <sub>2</sub> > 1% O <sub>2</sub> | 20% O <sub>2</sub> = 1% O <sub>2</sub> | 20% O <sub>2</sub> ≤ 1% O <sub>2</sub> |
| HUVECs <sub>T</sub>                     | N/A                                    | 20% O <sub>2</sub> > 1% O <sub>2</sub> | 20% O <sub>2</sub> > 1% O <sub>2</sub> | 20% O <sub>2</sub> > 1% O <sub>2</sub> |
| HUVECs, 20% O <sub>2</sub>              | N/A                                    | Plastic < ECM                          | Inconclusive                           | Plastic > ECM                          |
| HUVECs, 1% O <sub>2</sub>               | N/A                                    | Plastic < ECM                          | Plastic < ECM                          | Plastic ≤ ECM                          |
| No. of experiments                      | <i>n</i> = 4                           | <i>n</i> = 2                           | <i>n</i> = 2                           | <i>n</i> = 1                           |

For all experimental conditions, HUVECs expressed much higher endogenous MMP-2, MMP-9, and uPA activity per cell than PC-3 cells (data shown in Figure W1, A–C).

PC-3<sub>Bb</sub>, PC-3 cells grown adherently on Biosilon beads; PC-3<sub>T</sub>, PC-3 cells grown adherently on tissue culture plastic; HuvECM, HUVECs on ECM gel; HUVECs<sub>T</sub>, HUVECs grown adherently on tissue culture plastic; N/A, not applicable.

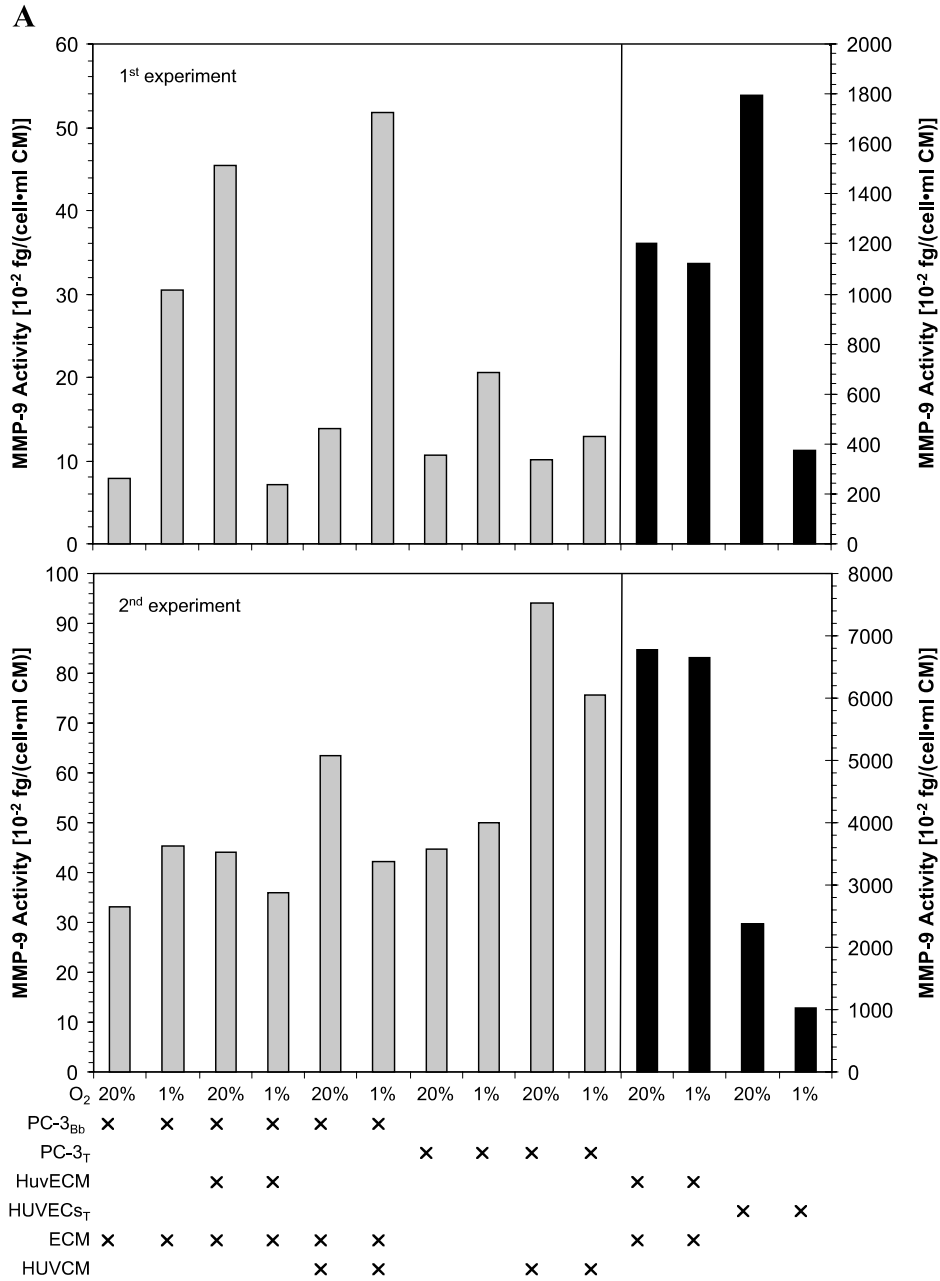

**Figure W1.** Endogenous (A) MMP-9, (B) MMP-2, and (C) uPA activities for PC-3 cells and HUVECs under different conditions, from two independent experiments. HUVECs expressed much higher endogenous MMP-9, MMP-2, and uPA activity per cell than PC-3 cells. PC-3<sub>Bb</sub>, PC-3 cells grown adherently on Biosilon beads; PC-3<sub>T</sub>, PC-3 cells grown adherently on tissue culture plastic; HuvECM, HUVECs on ECM gel; HUVECs<sub>T</sub>, HUVECs grown adherently on tissue culture plastic; HUVCM, HUVEC-conditioned cell culture medium; black bars corresponding to y-axis to the right, gray bars corresponding to y-axis to the left. The cell culture medium was RPMI 1640 supplemented with 9% FBS, 90 U/ml penicillin, and 90 μg/ml streptomycin. <sup>1</sup>In the second experiment, the MMP-2 standard delivered not a usable standard curve to calculate the concentrations. However, the enzyme activity per cell is directly proportional to the absorbance at 405 nm per cell ( $\delta Abs_{405}/cell$ ) still allowing the comparison of the different conditions if not absolute quantification.

**B**

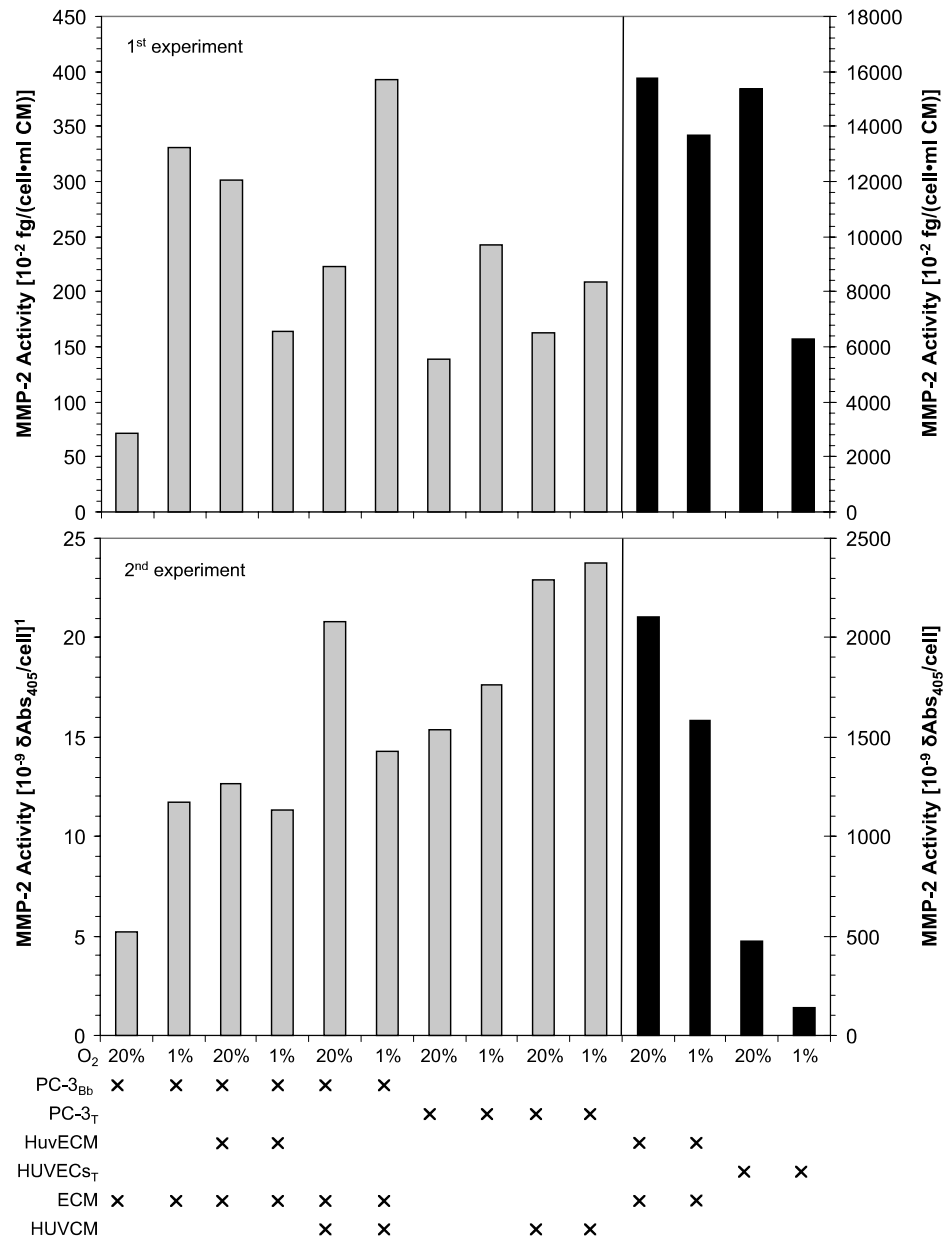

Figure W1. (continued).

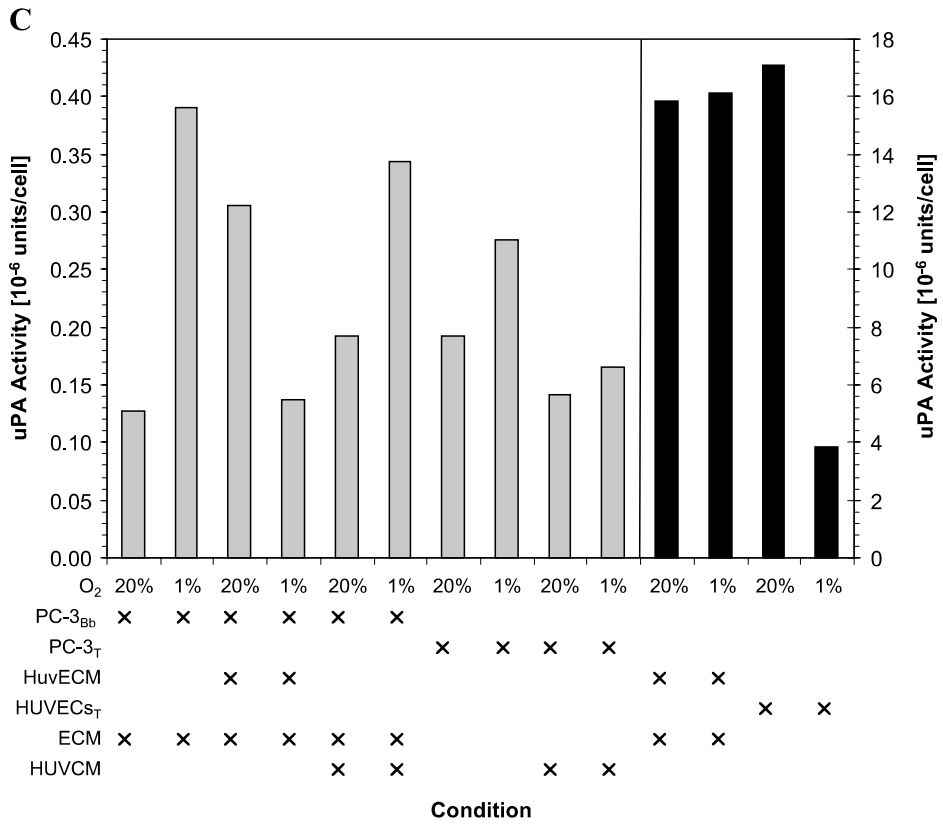

Figure W1. (continued).
